# Supplementary material for: Expression of the human PAC1 receptor leads to dose-dependent hydrocephalus-related abnormalities in mice
Source: JCI journal article supplement (doi:10.1172/jci27597), 2006-07-03
Supplement: sd1 [file 1]

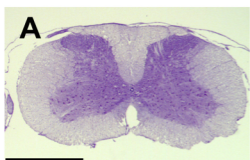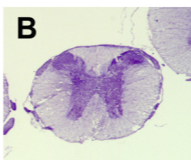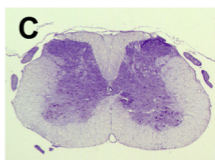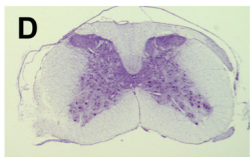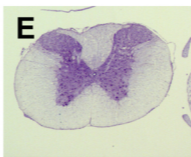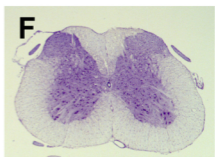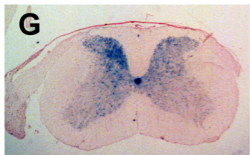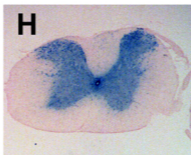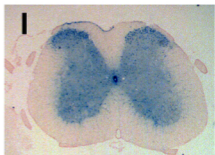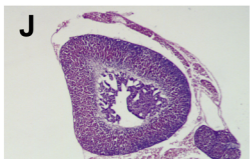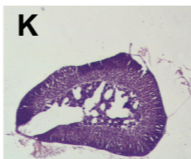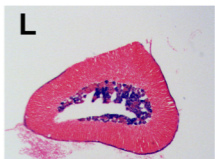

**WT**

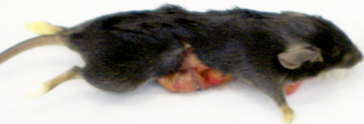

**Tg**

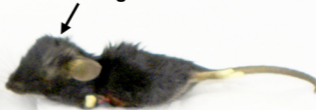

## Supplemental data

### Figure S1

**Transgene expression and normal appearance of the spinal cord and adrenal gland.** WT (**A-C**) and Tg (**D-I**) sections of cervical (**A, D, G**), thoracic (**B, E, H**) and lumbar (**C, F, I**) spinal cord were stained with cresyl violet (**A-F**) or co-stained with X-gal and Neural Red (**G-I**), showing comparable anatomic morphology of spinal cord between the WT and Tg mice, and transgene expression in the gray matter, especially in the ependymal cells of the central canal and in the dorsal horn. H&E (**J-K**) or X-gal and Eosin (**L**) staining of WT (**J**) and Tg (**K-L**) adrenal gland, showing comparable structure of adrenal gland between the WT and Tg adrenal gland and transgene expression in the adrenal medulla and capsule (**L**). Bars=1mm in A-L.

### Figure S2

**Hydrocephalus in PAC1-overexpressing mice.** An image of a 5-week-old WT mouse (**WT, left**) and a Tg3 homozygotic littermate (**Tg, right**) taken after perfusion, showing a dome-shaped skull, typical of a progressive hydrocephalus phenotype.
